# Supplementary material
Source: MDPI journal article supplement (https://www.mdpi.com/2073-4441/14/19/3166)

## Supplementary materials

**Table S1**

Mean and maximum (in parentheses) values of water depth and flow velocity in the channel zone of the control and backwater reaches of the Smolnik Stream, during small ( $1.8 \text{ m}^3 \text{ s}^{-1}$ ), medium ( $24.5 \text{ m}^3 \text{ s}^{-1}$ ) and large floods ( $89.5 \text{ m}^3 \text{ s}^{-1}$ ). For the backwater reach, the values for scenarios with and without backwater inundation by reservoir water are presented. Mann–Whitney test was used to evaluate difference of depth and flow velocity parameters between control and backwater reaches. Statistically significant differences are indicated (\* -  $p$  value  $< 0.01$ , \*\* -  $p$  value  $< 0.001$ , \*\*\* -  $p$  value  $< 0.0001$ , n.s. - not statistically significant).

| Parameter                          | Flood magnitude | River channel |                              |                           | Relative change (%) of mean in comparison to control reach and statistical significance of the difference |                           |
|------------------------------------|-----------------|---------------|------------------------------|---------------------------|-----------------------------------------------------------------------------------------------------------|---------------------------|
|                                    |                 | Control reach | Backwater reach              |                           |                                                                                                           |                           |
|                                    |                 |               | without backwater inundation | with backwater inundation | without backwater inundation                                                                              | with backwater inundation |
| Water depth (m)                    | Small           | 0.63 (1.74)   | 1.62 (2.42)                  | 2.07 (3.28)               | +157,14 ***                                                                                               | +228,57 ***               |
|                                    | Medium          | 1.25 (3.35)   | 2.71 (4.30)                  | 3.70 (5.53)               | +116,80 ***                                                                                               | +196,00 ***               |
|                                    | Large           | 1.92 (4.08)   | 3.46 (4.98)                  | 5.50 (7.38)               | +80,21 ***                                                                                                | +186,46 ***               |
| Flow velocity (m s <sup>-1</sup> ) | Small           | 0.86 (1.90)   | 0.52 (1.31)                  | 0.47 (1.32)               | -39,53 ***                                                                                                | -45,35 ***                |
|                                    | Medium          | 0.96 (2.22)   | 0.37 (1.05)                  | 0.18 (0.99)               | -61,46 ***                                                                                                | -81,25 ***                |
|                                    | Large           | 1.41 (4.04)   | 0.49 (1.55)                  | 0.11 (0.95)               | -65,25 ***                                                                                                | -92,20 ***                |

**Figure S1.** Maximum and minimum monthly water levels at the Rożnów Reservoir (1997-2019)

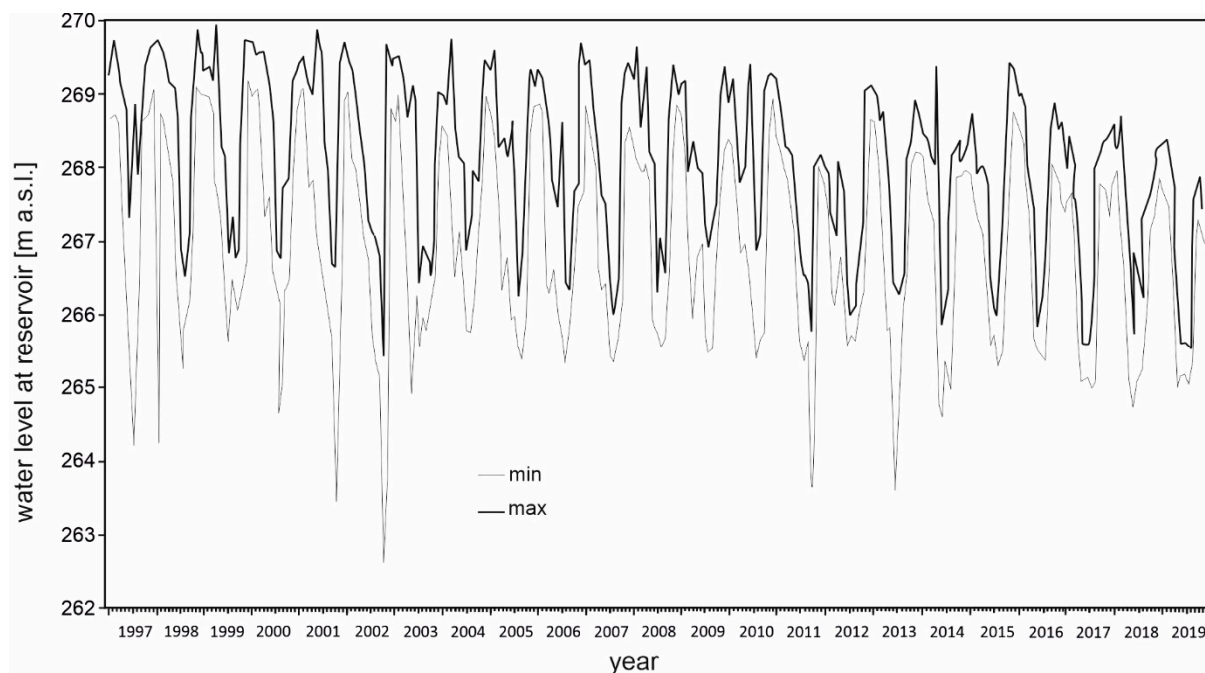

Supplement: s1 [file s1]
